## ANESTHESIOLOGY

# Hepatitis C Contamination of Medication Vials Accessed with Sterile Needles and Syringes

Janet M. van Vlymen, M.D., F.R.C.P.C.,  
Julie Magnus, M.Sc., Melanie Jaeger, M.D., F.R.C.P.C.,  
Sophie Breton, M.D., Nathan G. Taylor, M.Sc.,  
Rachel Phelan, M.Sc., Selena M. Sagan, Ph.D.

ANESTHESIOLOGY 2019; 131:305–14

## EDITOR'S PERSPECTIVE

### What We Already Know about This Topic

- Health care–acquired hepatitis C virus infection continues to occur
- Current guidelines caution against using multidose vials for more than one patient unless the vials are kept in a location away from the patient treatment area
- It is possible that in some circumstances these guidelines are not always followed

### What This Article Tells Us That Is New

- When a medication vial diaphragm is contaminated with hepatitis C virus, the contents of the vial can become contaminated with subsequent access with a clean syringe, and the viral content is sufficient to infect cells in culture
- Hepatitis C virus remains infectious in contaminated medications for several days
- Cleaning the vial surface with 70% isopropyl alcohol does not eliminate the risk of vial contamination with hepatitis C virus

In North America, nearly 4 million people are infected with hepatitis C virus, causing greater disease burden than any other infectious disease in the country.<sup>1–3</sup> Regrettably, health care–acquired hepatitis C virus infections continue to be reported as a result of unsafe injection practices, poor sanitation procedures, or contaminated medical equipment.<sup>4–10</sup> To address this, infection-control guidelines for safe medication administration are published by reputable organizations and widely disseminated. The American Society of

## ABSTRACT

**Background:** Health care–associated hepatitis C virus outbreaks from contaminated medication vials continue to be reported even though most practitioners deny reusing needles or syringes. The hypothesis was that when caring for hepatitis C virus–infected patients, healthcare providers may *inadvertently* contaminate the medication vial diaphragm and that subsequent access with sterile needles and syringes can transfer hepatitis C virus into the medication, where it remains stable in sufficient quantities to infect subsequent patients.

**Methods:** A parallel-arm lab study ( $n = 9$ ) was performed in which contamination of medication vials in healthcare settings was simulated using cell culture–derived hepatitis C virus. First, surface-contaminated vials were accessed with sterile needles and syringes, and then hepatitis C virus contamination was assessed in cell culture. Second, after contaminating several medications with hepatitis C virus, viral infectivity over time was assessed. Last, surface-contaminated vial diaphragms were disinfected with 70% isopropyl alcohol to determine whether disinfection of the vial surface was sufficient to eliminate hepatitis C virus infectivity.

**Results:** Contamination of medication vials with hepatitis C virus and subsequent access with sterile needles and syringes resulted in contamination of the vial contents in sufficient quantities to initiate an infection in cell culture. Hepatitis C virus remained viable for several days in several commonly used medications. Finally, a single or 2- to 3-s wipe of the vial diaphragm with 70% isopropyl alcohol was not sufficient to eliminate hepatitis C virus infectivity.

**Conclusions:** Hepatitis C virus can be transferred into commonly used medications when using sterile single-use needles and syringes where it remains viable for several days. Furthermore, cleaning the vial diaphragm with 70% isopropyl alcohol is not sufficient to eliminate the risk of hepatitis C virus infectivity. This highlights the potential risks associated with sharing medications between patients.

(ANESTHESIOLOGY 2019; 131:305–14)

Anesthesiologists (ASA), U.S. Centers for Disease Control and Prevention, and the Provincial Infectious Diseases Advisory Committee of Ontario all strongly caution against the reuse of needles or syringes.<sup>11–18</sup> These organizations advise that medication vials should only be used for a single patient, and if a vial is to be shared, strict aseptic techniques must be used to minimize transmission of blood-borne pathogens.<sup>11,12</sup> They also suggest that if multidose vials are used for more than one patient, the medication vials must be restricted to a centralized medication area and not brought into the immediate patient treatment area (*e.g.*, operating room, patient room/cubicle). Nevertheless, it has remained common practice in North America to share medication

Supplemental Digital Content is available for this article. Direct URL citations appear in the printed text and are available in both the HTML and PDF versions of this article. Links to the digital files are provided in the HTML text of this article on the Journal's Web site ([www.anesthesiology.org](http://www.anesthesiology.org)). J.M.v.V. and J.M. contributed equally to this article.

Submitted for publication August 20, 2018. Accepted for publication March 20, 2019. From the Department of Anesthesiology and Perioperative Medicine, Queen's University, Kingston, Ontario, Canada (J.M.v.V., M.J., S.B., R.P.); and the Departments of Microbiology and Immunology (J.M., N.G.T., S.M.S.) and Biochemistry (S.M.S.), McGill University, Montreal, Quebec, Canada.

Copyright © 2019, the American Society of Anesthesiologists, Inc. All Rights Reserved. Anesthesiology 2019; 131:305–14. DOI: 10.1097/ALN.0000000000002772

vials between patients in the operating room, provided single-use sterile needles and syringes are used.<sup>15,19–22</sup>

Over the past 5 yr, public health agencies in the province of Ontario, Canada, have reported four independent outbreaks of patient-to-patient hepatitis C virus transmission at endoscopy clinics, resulting in 16 new hepatitis C virus infections.<sup>23–26</sup> Investigations concluded that contaminated medications, administered by the anesthesiologist, were the likely source of transmission, but most of the anesthesiologists involved denied reusing needles or syringes when accessing a vial for multiple patients. Similar investigations in the United States have also traced hepatitis C virus transmission to the administration of contaminated medications by practitioners who claimed to have used sterile needles and syringes for each patient.<sup>4,7,9</sup> Despite persistent denials, investigators assume reuse of syringes, and alternative theories of contamination have not been explored.

Inadvertent contamination of anesthesiology workspaces, including medication preparation areas, has been clearly demonstrated.<sup>26–31</sup> In this environment, it is possible that a healthcare provider could unknowingly contaminate the rubber diaphragm of a medication vial with bodily fluids containing viral particles when caring for a hepatitis C virus-infected patient (many of whom are unaware of their hepatitis C virus status). If the contaminated vial is then used for additional patients, it is plausible that hepatitis C virus could be transmitted from the outer vial diaphragm into the medication itself, despite the use of a new sterile syringe and needle for each vial entry. With this in mind, we hypothesized that when caring for hepatitis C virus-infected patients, practitioners may *inadvertently* contaminate the medication vial diaphragm and that subsequent access with sterile needles and syringes can transfer hepatitis C virus into the medication, where it remains stable in sufficient quantities to infect subsequent patients. The primary objectives of this study are to determine: 1) whether hepatitis C virus can be transferred *via* a sterile needle and syringe into a medication vial if the rubber access diaphragm is contaminated; 2) whether hepatitis C virus remains viable in common medications; and 3) whether cleaning with 70% isopropyl alcohol is sufficient to eliminate the transmission risk.

## Material and Methods

### Determination of Hepatitis C Virus Infectivity

Infectious cell culture-derived hepatitis C virus was produced as described previously,<sup>32</sup> and viral titers were determined by focus-forming unit assay. Briefly, cell supernatants from hepatitis C virus-infected cells were serially diluted 10-fold in Dulbecco's modified Eagle's medium and used to infect  $4 \times 10^4$  Huh-7.5 cells/well (8-well chamber slides) for 5 h, and then cells were supplemented with fresh complete medium. Viral titers were determined at 3 days postinfection by immunofluorescence staining for hepatitis C virus

core (Supplemental Digital Content, Supplemental Materials and Methods, <http://links.lww.com/ALN/B951>). Viral titers are expressed as focus-forming units/ml, determined by the number of hepatitis C virus core-positive foci detected at the highest dilutions. Hepatitis C virus foci were defined as a minimum cluster of three hepatitis C virus core-positive cells.

### Quantification of Viral Titers in International Units

To quantify viral titers, additional hepatitis C virus RNA quantification was performed on the viral stock using a quantitative real-time reverse transcription–polymerase chain reaction assay (Center de Recherche du Center Hospitalier de l'Université de Montréal) as previously described.<sup>33</sup>

### Hepatitis C Virus Contamination Assay

The rubber access diaphragms (13 mm) of 5-ml glass medication vials containing 4 ml of cell culture medium were contaminated with 33  $\mu$ l (mean volume of an inadvertent contamination)<sup>34</sup> of hepatitis C virus stock ( $2.56 \times 10^7$ ,  $2.56 \times 10^6$ , or  $8 \times 10^5$  U/ml, representing high, intermediate, or low titers, respectively). Droplets were allowed to dry on the diaphragm surface (within the biological safety cabinet), and then the vials were accessed five times, each time using a sterile, blunt-fill needle and syringe (18 gauge  $\times$  1½ inch). Subsequently, the contents of the vial were used to infect  $8 \times 10^4$  Huh-7.5 cells. As positive and negative controls, the cell culture medium was directly contaminated with 33  $\mu$ l of hepatitis C virus or replication-defective viral stock, respectively. Hepatitis C virus contamination was assessed by focus-forming unit assay or quantitative real-time reverse transcription–polymerase chain reaction analysis at 5 days postinfection. Assessment of contamination was performed for each sample on a nominal scale where each replicate was split into 8 wells of a chamber slide, and a positive-well was indicated by a minimum of three hepatitis C virus foci. The data were summarized using the mean frequency of hepatitis C virus-positive wells per condition with standard error.

### Medications

The commonly used medications examined individually for hepatitis C virus stability and viability include: dexamethasone (4 mg/ml, Omega, Canada), lidocaine HCl injection with methylparaben 1 mg/ml as preservative (10 mg/ml, Aveda Pharma, Canada), neostigmine methylsulfate (1 mg/ml, Omega), phenylephrine HCl (10 mg/ml, Sandoz, Canada), propofol (10 mg/ml, Fresenius Kabi, Canada), rocuronium bromide (10 mg/ml, Sandoz), and vehicle (normal saline, 0.9%).

### Hepatitis C Virus Stability Assay

Infectious hepatitis C virus stock ( $3.27 \times 10^5$  focus-forming units/ml) was diluted 1:10 in dexamethasone, lidocaine, neostigmine, phenylephrine, propofol, rocuronium,

or vehicle (saline) and incubated at room temperature. At 0 to 72 h, 100  $\mu$ l of contaminated medications were further diluted to a final concentration of 10% (6% for lidocaine) in cell culture medium. Medication dilutions were then used to infect  $8 \times 10^4$  Huh-7.5 cells, and focus-forming unit assay or quantitative real-time reverse transcription–polymerase chain reaction analyses were performed at 5 days postinfection.

### Evaluation of Disinfection Methods

Rubber diaphragms (13 mm) were contaminated with  $3.27 \times 10^5$  focus-forming units/ml hepatitis C virus stock (as described above) and subsequently cleaned with a 70% isopropyl alcohol swab using a single, 2- to 3-s, or 10-s wipe with friction with or without drying. Rubber diaphragms were rehydrated in 2 ml of cell culture medium for 1 h, and this medium was then used to infect  $9 \times 10^4$  Huh-7.5 cells seeded in 6-well plates. After 5 h, input medium was replaced with fresh medium, and hepatitis C virus contamination was assessed by focus-forming unit assay or quantitative real-time reverse transcription–polymerase chain reaction analyses at 5 days postinfection. Untreated rubber diaphragms contaminated with hepatitis C virus or replication-defective virus stock were used as positive and negative controls, respectively.

### Data Analysis

All statistical analyses were performed using GraphPad Prism v7 (GraphPad, USA). No *a priori* statistical power calculation was conducted. The sample size was based on similar studies, as well as our previous experience with studies of similar design. All data are representative of three independent experiments with three independent replicates per experiment ( $n = 9$ ). All data points are representative of eight (focus-forming unit assays) or two (quantitative real-time reverse transcription–polymerase chain reaction assays) independent measurements per replicate, and error bars represent the SD. Statistical significance was determined using a one-way ANOVA with Tukey's multiple comparison test to provide statistically significant differences from the medium-only control.

## Results

### Hepatitis C Virus Can Be Transferred into Medication Vials with Single-use Needles and Syringes

To simulate clinical contamination scenarios, rubber diaphragms of medication vials containing cell culture medium were contaminated with high-, intermediate-, or low-titer concentrations of hepatitis C virus (where the low titer,  $8 \times 10^5$  U/ml, represents the boundary between a low and high viral load clinically).<sup>35</sup> After drying and reaccessing vials with a sterile needle and syringe to simulate medication reaccess for multiple patients, the contents were

assessed for hepatitis C virus infectivity using a focus-forming unit assay. At all titers tested, hepatitis C virus foci were present in surface contaminated vials after access with sterile needles and syringes (fig. 1A; fig. S1, Supplemental Digital Content, <http://links.lww.com/ALN/B951>, showing hepatitis C virus foci at high and intermediate titers). When contaminated with the highest titer, 100% (72 of 72 wells) were hepatitis C virus–positive (fig. 1B). For the intermediate and low titers, 85% (61 of 72 wells) and 43% (31 of 72 wells) were hepatitis C virus–positive, respectively, suggesting a dose-dependent decrease in hepatitis C virus contamination (fig. 1B). Quantification of the level of contamination using quantitative real-time reverse transcription–polymerase chain reaction analysis resulting from the high titer contamination yielded, on average,  $3.4 \times 10^6$  hepatitis C virus genome copies/ml after 5 days in culture (fig. 1C). However, quantitative real-time reverse transcription–polymerase chain reaction was not sensitive enough to detect viral RNA contamination resulting from the intermediate or low titer. Taken together, these results suggest that hepatitis C virus can be efficiently transferred from the surface of medication vials *via* access with sterile needles and syringes, resulting in contamination of the vial contents in sufficient quantities to initiate an infection in cell culture.

### Hepatitis C Virus Remains Infectious after Incubation for Several Days in Common Medications

In line with previous studies,<sup>34,36–39</sup> we found that hepatitis C virus remained relatively stable at room temperature and resulted in less than a 0.5-log reduction in infectivity after 72 h in cell culture medium (fig. 2). In addition, hepatitis C virus remained stable and infectious in all medications tested for more than 72 h as assessed by both focus-forming unit assay (fig. 2) and quantitative real-time reverse transcription–polymerase chain reaction analysis (fig. 3, A through F). Importantly, with the exception of lidocaine, none of the medications were toxic to the cells at a 10% dilution in cell culture medium (Supplemental Digital Content, <http://links.lww.com/ALN/B951>, table S1, medication concentrations that maintain 90% cell viability, and fig. S2, cell viability dose-response curves of medications). Because of the greater cytotoxicity observed with lidocaine, we diluted lidocaine to a 6% final concentration in stability and infectivity assays (figs. 2 and 3). Taken together, these results suggest that once contaminated with hepatitis C virus, the virus remains stable and infectious for at least 72 h in all medications tested in sufficient quantities to initiate an infection in cell culture.

### Common Vial Diaphragm Cleaning Methods Are Not Sufficient to Eliminate Hepatitis C Virus Infectivity

To assess whether cleaning with 70% isopropyl alcohol was sufficient to eliminate hepatitis C virus infectivity, we

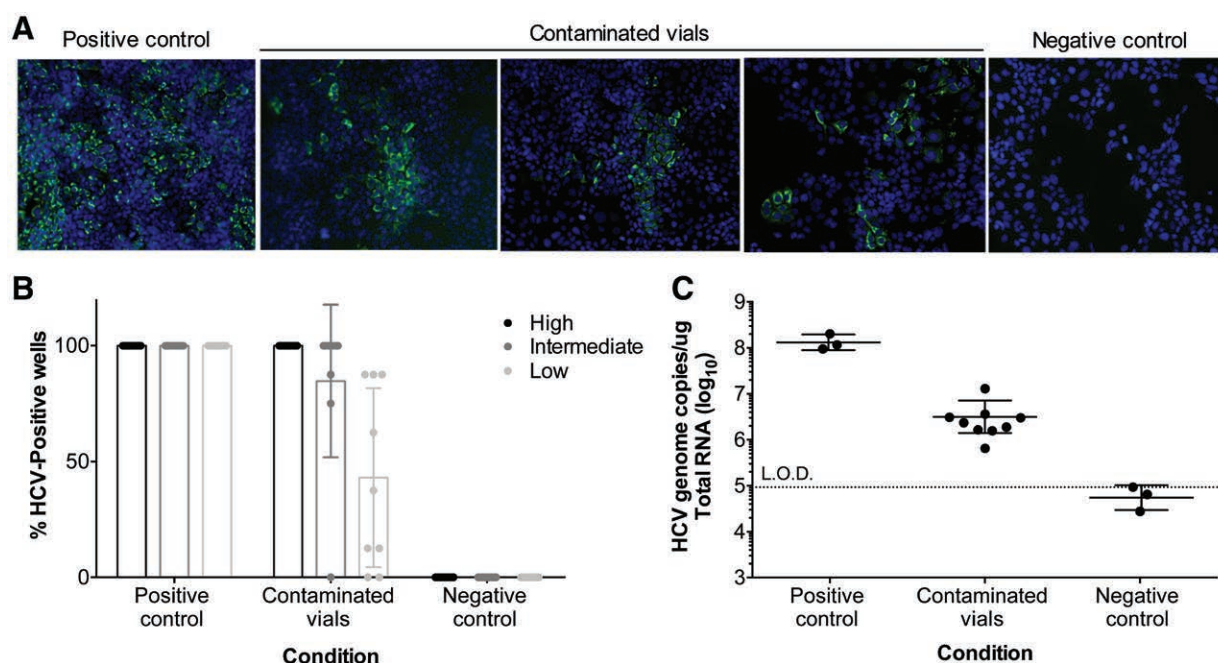

**Fig. 1.** Hepatitis C virus (HCV) can be transferred *via* sterile needle and syringe into medication vials if the rubber diaphragm is contaminated at all HCV titers tested. (A) Representative fluorescence microscopy images from Huh-7.5 cells in 8-well chamber slides grown in cell culture medium from medication vials contaminated with a high titer ( $2.56 \times 10^7$  U/ml) of HCV. The cells were fixed and stained with 4[prime],6[prime]-diamino-2-phenylindole (blue, cell nuclei) and anti-HCV core antibody (green, HCV core protein). (B) The percentage of HCV-positive wells in focus-forming unit assays using high- ( $2.56 \times 10^7$  U/ml), intermediate- ( $2.56 \times 10^6$  U/ml), and low-titer ( $8 \times 10^5$  U/ml) HCV. A positive well is defined as a minimum of three HCV foci/well, where HCV foci are defined by a minimum cluster of three HCV core-positive cells. All data are representative of at least three independent experiments, and *error bars* represent SD. (C) Quantitative real-time reverse transcription–polymerase chain reaction analyses of vials contaminated with high titer HCV. All data are representative of at least three independent experiments, and *error bars* represent the SD.

contaminated rubber access diaphragms, cleaned the diaphragms with alcohol swabs, and then assayed for residual hepatitis C virus infectivity. We found that a single or 2- to 3-s wipe with 70% isopropyl alcohol was not sufficient to eliminate infectivity, and hepatitis C virus foci were readily observed under these conditions (fig. 4, A and B). A 2- to 3-s wipe resulted in a ~1-log reduction in hepatitis C virus genome copies compared to the untreated positive control (fig. 4C). When we performed a 10-s wipe with friction (the recommended cleaning protocol in the Centers for Disease Control, ASA, and Ontario guidelines<sup>12,14,18</sup>), in most cases, we were unable to observe hepatitis C virus foci, except for one instance in which a single foci was observed (data not shown). Furthermore, even though a 10-s wipe was below the limit of detection in most replicates (and similar to the negative control sample by quantitative real-time reverse transcription–polymerase chain reaction analysis), viral RNA was detected in two replicates after 5 days in culture (fig. 4C). We did not observe significant differences in efficacy whether or not the alcohol was allowed to dry in any of the conditions tested. Taken together, this suggests that a single or 2- to 3-s wipe with 70% isopropyl

alcohol does not ensure reliable elimination in hepatitis C virus infectivity. Moreover, although a 10-s wipe dramatically reduced the risk of contamination, it was not sufficient to eliminate hepatitis C virus infectivity in all replicates.

## Discussion

This study demonstrates that if poor hand hygiene and infection control practices inadvertently cause tiny amounts of hepatitis C virus to be placed on the outside of a medication vial, the contents of the vial can be unknowingly contaminated. The virus can be easily transferred from the surface of the vial into the vial contents in sufficient quantities to cause an infection, even when the vial is accessed with a sterile needle and syringe. This may result in health care–associated hepatitis C infection when sharing medication vials and strongly supports the possibility of a previously unreported mechanism of nosocomial hepatitis C virus transmission.

At all titers tested, we observed hepatitis C virus contamination, and the dose-dependent nature of the resultant hepatitis C virus infectivity is consistent with our hypothesis



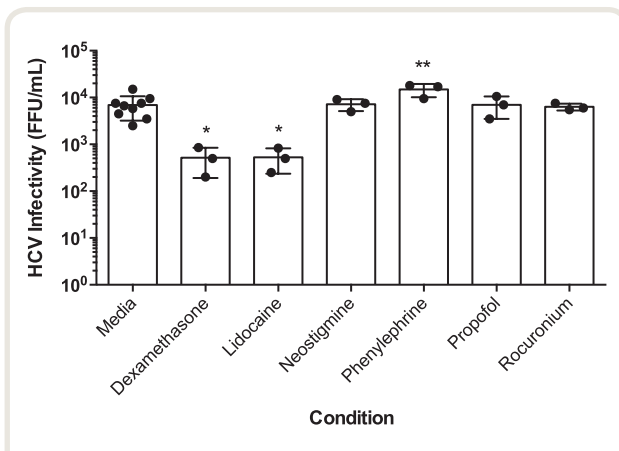

**Fig. 2.** Hepatitis C virus (HCV) remains infectious after incubation in all medications tested for at least 72 h. High-titer ( $3.27 \times 10^5$  focus-forming unit [FFU]/ml) HCV stock was diluted in cell culture medium or the indicated medications. After 72 h, medications were further diluted in cell culture medium and plated on Huh-7.5 cells. Viral titers were assessed by FFU assay at 5 days postinfection. All data are representative of at least three independent replicates, and error bars represent SD. The *P* values were calculated using one-way ANOVA. \**P* ≤ 0.05; \*\**P* ≤ 0.01.

and supports its face validity. It is noteworthy that even at the lowest titer tested (designed to specifically reflect the hepatitis C virus titer of a patient at the boundary between a low and high viral load,  $8 \times 10^5$  U/ml),<sup>35</sup> contamination was clearly demonstrated. We also found that hepatitis C virus remained stable and infectious for at least 72 h in sufficient quantities to initiate an infection in cell culture in several commonly used medications. The most unsettling observation may be that a single or 2- to 3-s wipe with an alcohol swab was not sufficient to eliminate hepatitis C virus infectivity, although a reduction in hepatitis C virus genome copies was observed. Even after scrubbing the vial diaphragm for 10 s with 70% isopropyl alcohol, we were still able to detect hepatitis C virus in two replicates, which suggests that this results in a substantial reduction, but not complete elimination, of the risk of hepatitis C virus transmission. However, because this study was neither designed nor powered to determine the optimal cleaning protocol to eliminate the risk of transmission, we are unable to categorically recommend a “safe” cleaning procedure. Nonetheless, we demonstrated that a potential infection risk still remains even when implementing the recommended strict cleaning protocol. Considering typical clinical practice, scrubbing the top of the vial with a 70% isopropyl alcohol swab for 10 s and allowing the vial to dry is rarely done.<sup>22</sup> In fact, a recent survey demonstrated that only 5% of anesthesiologists claimed to routinely disinfect medication vials by scrubbing the vial diaphragm with alcohol for 10 s before accessing it for more than one patient.<sup>22</sup>

Although it is reassuring that using a new sterile needle and syringe for each patient appears to be the standard of

care, survey evidence demonstrates that 3 to 7% of respondents still admit to reusing syringes.<sup>20–22</sup> Using medication vials for more than one patient is a much more prevalent practice that raises several complex issues. Our recent survey suggests that more than half of the anesthesia providers share medications between patients.<sup>22</sup> The reasons for this include cost reduction, medication shortages, as well as packaging design (vials much larger than single-patient doses). Sharing medications between patients may be even more common in developing countries where there are frequent drug shortages. Even though this practice is not consistent with the Centers for Disease Control and ASA guidelines,<sup>14,18</sup> almost all practitioners surveyed considered the risk of transmitting blood-borne pathogens to be negligible provided sterile needles and syringes are used.<sup>22</sup>

The Centers for Disease Control guidelines state to “dedicate multidose vials to a single patient whenever possible. If multidose vials are used for more than one patient, restrict them to a centralized medication area and do not bring them into the immediate patient treatment area (e.g., operating room).”<sup>11</sup> The Association of Anaesthetists of Great Britain and Ireland and the Australian and New Zealand College of Anaesthetists both caution against sharing of multidose vials and recommend using aseptic techniques when preparing medications.<sup>40,41</sup> The concept of a medication preparation area that is geographically remote from the patient care area, although standard throughout most hospitals, may not always exist in the operating room. Anesthesiologists are constantly moving between the patient, the anesthetic machine (patient care area), and the medication cart (medication preparation area), areas that are not geographically separated. The nature of this practice demands emergent management decisions, often requiring multiple medications drawn up within seconds to maintain patient safety; it is simply not feasible to go to a geographically remote area to draw up medications.

This reality is confounded by the contamination risks that exist in a typical operating room. As an illustration, a unique simulation study used fluorescent marker on a mannequin’s lips and inside the mouth to demonstrate that 13 locations in an operating room were contaminated 100% of the time within a 6-min simulated scenario.<sup>30</sup> Most notable of these were the anesthesia machine surface, anesthesia cart, and the intravenous injection port. Medication syringes were contaminated 90% of the time; however, because this was a simulation, medication vials were not actually accessed within the scenario. Remarkably, hepatitis C virus has been shown to remain infectious for up to 6 weeks at room temperature on inanimate surfaces.<sup>34,37</sup> Because a single drop of blood could contain hundreds of thousands of hepatitis C virus particles<sup>42–45</sup> and an infection may be transmitted by as few as 10 viral particles,<sup>46</sup> the consequences of breaches in infection control are alarming. An exposed medication vial diaphragm could thus inadvertently and unknowingly become contaminated with bodily

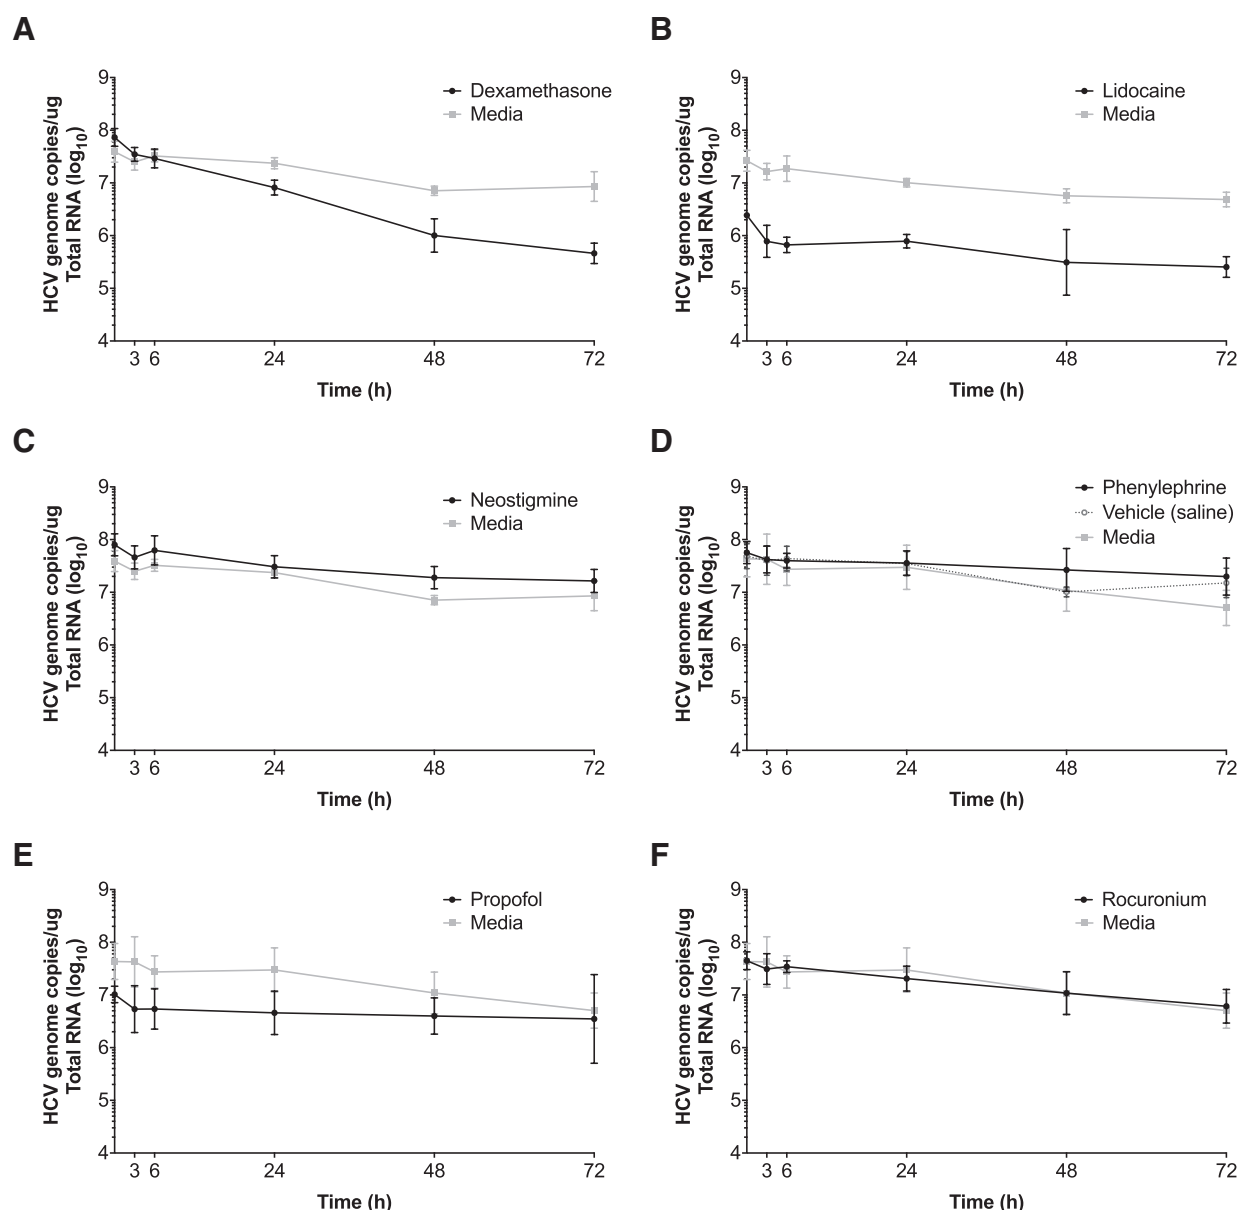

**Fig. 3.** Hepatitis C virus (HCV) remains stable in all medications tested for at least 72 h. High-titer ( $3.27 \times 10^5$  focus-forming unit/ml) HCV stock was diluted in dexamethasone (A), lidocaine (B), neostigmine (C), phenylephrine and vehicle (saline; D), propofol (E), rocuronium (F), or cell culture medium. At the indicated time points, contaminated medications were further diluted in cell culture medium and plated on Huh-7.5 cells. HCV genome copies were assessed by quantitative real-time reverse transcription–polymerase chain reaction analysis at 5 days postinfection. All data are representative of three independent experiments, and *error bars* represent SD.

fluids containing hepatitis C virus. Similar to our observations, several other studies have demonstrated that hepatitis C virus remains stable and infectious in a number of medications commonly used in anesthesia practice.<sup>36,39</sup>

The risk of patient-to-patient transmission of hepatitis C virus could be eliminated by strict adoption of the recommendation never to use a medication vial for more than one patient. However, this will inevitably lead to increased

waste, increased cost, and further exacerbations of medication shortages. Short-term solutions could involve pharmacy-prepared single-patient dose syringes using true aseptic technique, whereas a long-term solution would require the pharmaceutical industry to package medications in single-patient doses to avoid excessive waste. Pediatric single-patient doses are particularly challenging and thus may be more difficult to address. The increasing incidence of

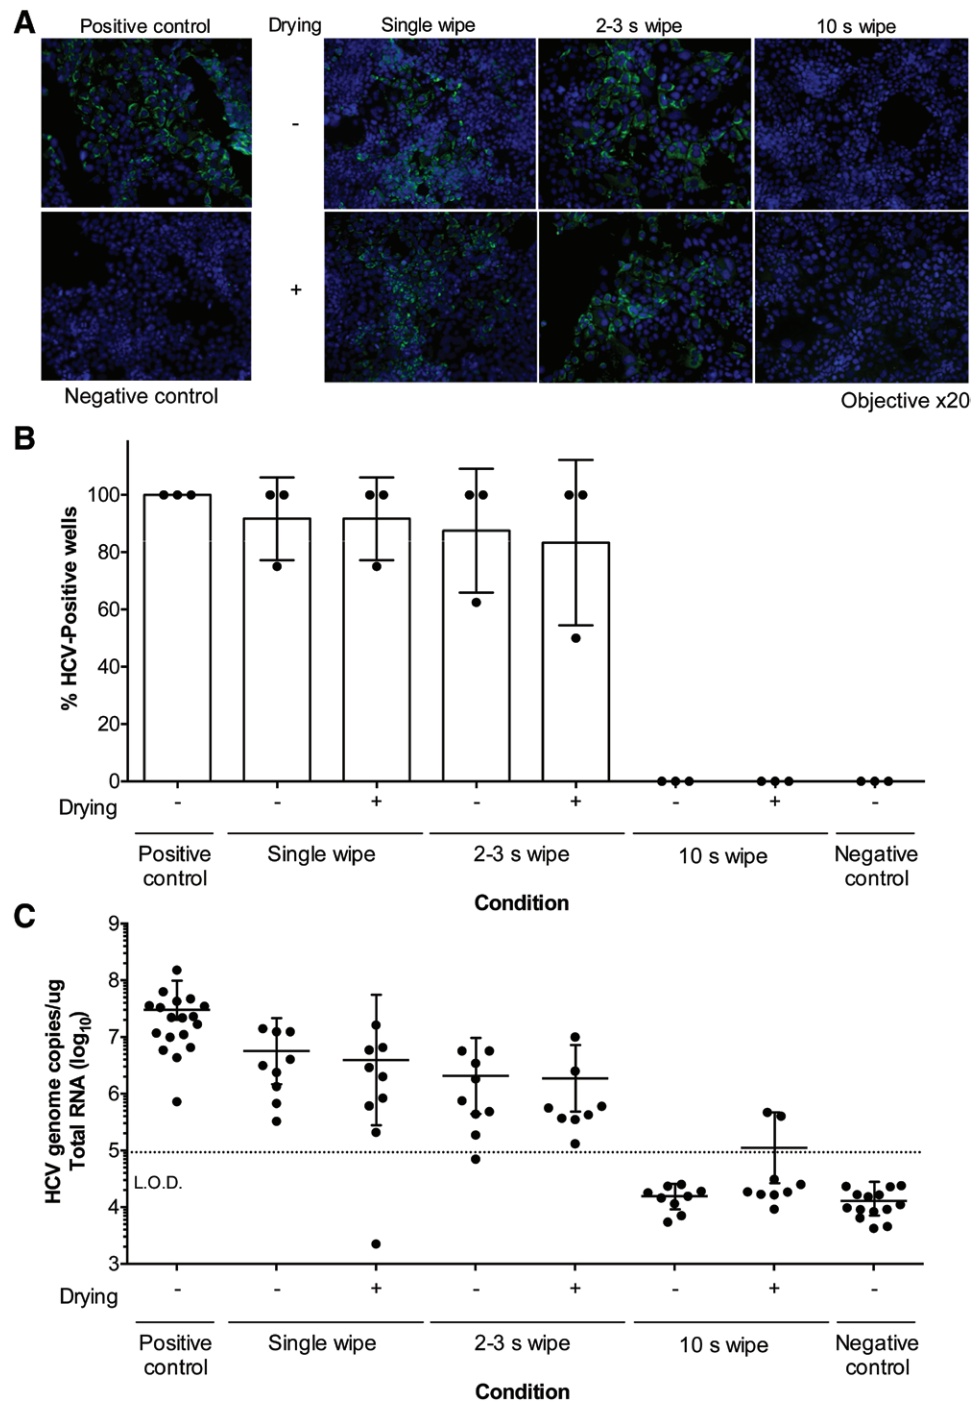

**Fig. 4.** Cleaning vial diaphragms with 70% isopropyl alcohol is not sufficient to eliminate hepatitis C virus (HCV) infectivity. (A) Representative fluorescence microscopy images from Huh-7.5 cells in 8-well chamber slides grown from cell culture medium from high titer ( $2.56 \times 10^7$  U/ml) HCV-contaminated and rehydrated rubber vial diaphragms after cleaning with 70% isopropyl alcohol with or without drying. The cells were fixed and stained with 4[prime],6[prime]-diamino-2-phenylindole (blue, cell nuclei) and anti-HCV core antibody (green, HCV core protein). (B) Percentage of HCV-positive wells in focus-forming unit assays from high-titer HCV-contaminated and rehydrated rubber vial diaphragms after cleaning with 70% isopropyl alcohol with and without drying. A positive well is defined as a minimum of three HCV foci/well, where HCV foci are defined by a minimum cluster of three HCV core-positive cells. (C) Quantitative real-time reverse transcription-polymerase chain reaction analyses from high-titer HCV-contaminated and rehydrated rubber vial diaphragms after cleaning with 70% isopropyl alcohol with and without drying. All data are representative of three independent experiments, and error bars represent SD ( $n = 9$  for all samples); data points below the axis limits are not shown.

nosocomial hepatitis C virus infections is simply not acceptable; thus, we recommend investment in education and knowledge translation across medical specialties, elimination of multidose vials, and use of single-dose vials for only one patient to minimize the risk of nosocomial hepatitis C virus infections. Our recommendations are supported by recent guidelines from the Society for Healthcare Epidemiology of America.<sup>47</sup> The Society for Healthcare Epidemiology of America guidelines emphasize the growing evidence for contamination of the anesthesia workspace leading to health care–associated infections and increased risk of mortality. The authors acknowledge the challenging environment for anesthesiologists but also include several achievable recommendations including more frequent hand hygiene, better environmental cleaning between cases, disinfection of intravenous ports and medication vials with alcohol, use of multidose vials for only one patient, and removal of all syringes from the operating room at the end of a case.

## Limitations

Importantly, our study has several limitations, the most significant being that it was performed *in vitro*. Every attempt was made to appropriately and accurately simulate the clinical practice environment as outlined in the Materials and Methods, but for obvious reasons, an *in vivo* study was not possible. Second, this is a descriptive study, with the aim to simply demonstrate the “possibility” of disease transmission by this mechanism. This study was not statistically powered to determine the incidence, probability, or frequency of contamination. Last, we used medications packaged in both single-dose and multidose formats. We did not make distinctions based upon single or multidose labels, formulations, or preservatives used to prolong shelf-life. However, previous studies have noted that lipid-based formulations, such as propofol, that contain an emulsion of soybean oil, glycerol, and egg lecithin may prolong hepatitis C virus stability because the virus is strongly associated with lipoproteins, and the lipid envelope of the viral particle may help the virus to resist drying or dehydration.<sup>34,39</sup> Furthermore, the label “multidose” may be misinterpreted as “safe for use in multiple patients.” For example, rocuronium (10 mg/ml, Sandoz) is labeled multidose” but is preservative-free, whereas phenylephrine (10 mg/ml, Sandoz) is labeled single-dose and preservative-free but contains metabisulfites. Regardless, the use of preservatives or antimicrobial agents in multidose vials does not protect against the risk of viral contamination.

## Conclusions

This study has demonstrated that hepatitis C virus can be transferred *via* sterile needle and syringe into medication vials if the diaphragm is contaminated with hepatitis C virus-containing fluid. Additionally, in keeping with previous studies, hepatitis C virus remains stable and infectious in several commonly used medications. Of even greater

concern, a single or 2- to 3-s wipe of the vial diaphragm with 70% isopropyl alcohol was not sufficient to eliminate hepatitis C virus infectivity. Therefore, we conclude that even with clean needles/syringes and aseptic technique, the potential for hepatitis C virus transmission still exists when medication vials are used for more than one patient.

## Acknowledgments

The authors thank Charles Rice, Ph.D. (Rockefeller University, New York, New York), and Rodney S. Russell, Ph.D. (Memorial University of Newfoundland, St. John's, Newfoundland, Canada), for generously providing Huh-7.5 cells and JFH-1T, respectively. We are also grateful to Nathalie Bédard, M.Sc., and Naglaa Shoukry, Ph.D. (Center de Recherche Center Hospitalier de l'Université de Montréal, Montreal, Quebec, Canada), for technical support in quantification of viral titers in International Units.

## Research Support

Supported by grants from the Clinical Teachers' Association of Queen's University Endowment Fund (Kingston, Ontario, Canada) and the Anesthesia Patient Safety Foundation (Rochester, Minnesota). In addition, this research was undertaken, in part, thanks to funding from the Canada Research Chairs program.

## Competing Interests

The authors declare no competing interests.

## Correspondence

Address correspondence to Dr. Sagan: McGill University, 3655 Promenade Sir William Osler, Room 805B, Montreal, Quebec H3G 1Y6, Canada. selen.sagan@mcgill.ca. Information on purchasing reprints may be found at [www.anesthesiology.org](http://www.anesthesiology.org) or on the masthead page at the beginning of this issue. ANESTHESIOLOGY's articles are made freely accessible to all readers, for personal use only, 6 months from the cover date of the issue.

## References

1. Public Health Agency of Canada. Report on Hepatitis B and C in Canada: 2014. Centre for Communicable Diseases and Infection Control, Infectious Disease Prevention and Control Branch, Public Health Agency of Canada. 2017. Available at: <https://www.canada.ca/en/services/health/publications/diseases-conditions/report-hepatitis-b-c-canada-2014.html>. Accessed July 8, 2018
2. Edlin BR, Eckhardt BJ, Shu MA, Holmberg SD, Swan T: Toward a more accurate estimate of the prevalence of hepatitis C in the United States. *Hepatology* 2015; 62:1353–63



3. Sagan SM, Dupont B, Grebely J, Krajden M, MacParland SA, Raven JF, Saeed S, Feld JJ, Tyrrell DL, Wilson JA: Highlights of the Fourth Canadian Symposium on Hepatitis C: Moving towards a national action plan. *Can J Gastroenterol Hepatol* 2016; 2016:5743521
4. Apostolou A, Bartholomew ML, Greeley R, Guilfoyle SM, Gordon M, Genese C, Davis JP, Montana B, Borlaug G; Centers for Disease Control and Prevention: Transmission of hepatitis C virus associated with surgical procedures: New Jersey 2010 and Wisconsin 2011. *MMWR Morb Mortal Wkly Rep* 2015; 64:165–70
5. Branch-Elliman W, Weiss D, Balter S, Bornschlegel K, Phillips M: Hepatitis C transmission due to contamination of multidose medication vials: Summary of an outbreak and a call to action. *Am J Infect Control* 2013; 41:92–4
6. The Joint Commission. Sentinel Event Alert. Preventing infection from the misuse of vials. 2014. Available at: [https://www.jointcommission.org/assets/1/6/SEA\\_52.pdf](https://www.jointcommission.org/assets/1/6/SEA_52.pdf). Accessed July 11, 2018
7. DeMaria A Jr, Snyderman DR: Nosocomial hepatitis C: More of a hidden epidemic. *Ann Intern Med* 2012; 156:534–5
8. Gutelius B, Perz JF, Parker MM, Hallack R, Stricof R, Clement EJ, Lin Y, Xia GL, Punsalang A, Eramo A, Layton M, Balter S: Multiple clusters of hepatitis virus infections associated with anesthesia for outpatient endoscopy procedures. *Gastroenterology* 2010; 139:163–70
9. Muleta D, Kainer MA, Moore-Moravian L, Wiese A, Ward J, McMaster S, Nguyen D, Forbi JC, Mixson-Hayden T, Collier M: Notes from the field: Hepatitis C outbreak in a dialysis clinic—Tennessee, 2014. *MMWR Morb Mortal Wkly Rep* 2016; 64:1386–7
10. Kuehn BM: Unsafe injection practices plague US outpatient facilities, harm patients. *JAMA* 2012; 308:2551–2
11. Healthcare Infection Control Practices Advisory Committee. Core Infection Prevention and Control Practices for Safe Healthcare Delivery in All Settings: Recommendations of the Healthcare Infection Control Practices Advisory Committee (HICPAC). 2017. Available at: <https://www.cdc.gov/hicpac/pdf/core-practices.pdf>. Accessed July 8, 2018
12. Ontario Agency for Health Protection and Promotion (Public Health Ontario), Provincial Infectious Diseases Advisory Committee. Infection Prevention and Control for Clinical Office Practice. 1st Revision. Toronto, Canada: Queen's Printer for Ontario. 2015. Available at: [http://www.publichealthontario.ca/en/eRepository/IPAC\\_Clinical\\_Office\\_Practice\\_2013.pdf](http://www.publichealthontario.ca/en/eRepository/IPAC_Clinical_Office_Practice_2013.pdf). Accessed July 8, 2018
13. Dolan SA, Arias KM, Felizardo G, Barnes S, Kraska S, Patrick M, Bumsted A: APIC position paper: Safe injection, infusion, and medication vial practices in health care. *Am J Infect Control* 2016; 44:750–7
14. Centers for Disease Control and Prevention National Center for Emerging and Zoonotic Infectious Diseases (NCEZID) Division of Healthcare Quality Promotion (DHQP): Injection Safety: Frequently asked questions (FAQs) regarding Safe Practices for Medical Injections. 2010. Available at: [http://www.cdc.gov/injectionsafety/providers/provider\\_faqs\\_multivials.html](http://www.cdc.gov/injectionsafety/providers/provider_faqs_multivials.html). Accessed July 8, 2018
15. Schaefer MK, Jhung M, Dahl M, Schillie S, Simpson C, Llata E, Link-Gelles R, Sinkowitz-Cochran R, Patel P, Bolyard E, Sehulster L, Srinivasan A, Perz JF: Infection control assessment of ambulatory surgical centers. *JAMA* 2010; 303:2273–9
16. Public Health Ontario: Updated guidance on the use of multidose vials. 2015. Available at: <https://www.publichealthontario.ca/en/BrowseByTopic/InfectiousDiseases/PIDAC/Pages/Infection-Prevention-and-Control-for-Clinical-Office-Practice-Multidose-Vials.aspx>. Accessed July 8, 2018
17. The College of Physicians and Surgeons of Ontario: The safe administration of injectables. *Dialogue Magazine* 2014; 10:64–5
18. American Society of Anesthesiologists Committee on Occupational Health Task Force on Infection Control. Recommendations for Infection Control for the Practice of Anesthesiology (Third Edition). Available at: <https://www.asahq.org/-/media/sites/asahq/files/public/resources/asa-committees/recommendations-for-infection-control-for-the-practice-of-anesthesiology.pdf?la=en&hash=B1C94D3009D3D19C301C72B7EC-E74CA325FE15F4>. Accessed July 8, 2018
19. Pugliese G, Gosnell C, Bartley JM, Robinson S: Injection practices among clinicians in United States health care settings. *Am J Infect Control* 2010; 38:789–98
20. Gounder P, Beers R, Bornschlegel K, Hinterland K, Balter S: Medication injection safety knowledge and practices among anesthesiologists: New York State, 2011. *J Clin Anesth* 2013; 25:521–8
21. Kossover-Smith RA, Coutts K, Hatfield KM, Cochran R, Akselrod H, Schaefer MK, Perz JF, Bruss K: One needle, one syringe, only one time?: A survey of physician and nurse knowledge, attitudes, and practices around injection safety. *Am J Infect Control* 2017; 45:1018–23
22. Breton S, van Vlymen J, Xia S, Holden RR, Phelan R, Sagan SM, Jaeger M: A survey of medication preparation and administration practices among members of the Canadian Anesthesiologists' Society. *Can J Anaesth* 2018; 65:1100–9
23. Toronto Public Health: HCV Outbreak Investigation: Downsview Endoscopy Clinic. *Final Report* 2014; 1–14. Available at: <https://www.toronto.ca/wp-content/uploads/2017/10/8dc0-TPH-IPAC-Downsview-Endoscopy-Clinic-Fin-OB-Report-Oct-6-2014.pdf>. Accessed July 8, 2018

24. Toronto Public Health: HCV Outbreak Investigation: North Scarborough Endoscopy Clinic (NSEC) *Final Report* 2014; 1–12. Available at: <https://www.toronto.ca/wp-content/uploads/2017/10/8d9e-TPH-IPAC-North-Scarboro-Endoscopy-Clinic-Final-OB-Report-Oct-8-2014.pdf>. Accessed July 8, 2018
25. Toronto Public Health: HCV Outbreak Investigation: Ontario Endoscopy Clinic. *Final Report* 2015; 1–13. Available at: <https://www.toronto.ca/wp-content/uploads/2017/10/9576-TPH-IPAC-Ontario-Endoscopy-Clinic-Final-OB-Report-Apr-24-2015.pdf>. Accessed July 8, 2018
26. Hopf HW: Bacterial reservoirs in the operating room. *Anesth Analg* 2015; 120:700–2
27. Birnbach DJ, Rosen LF, Fitzpatrick M, Carling P, Arheart KL, Munoz-Price LS: Double gloves: A randomized trial to evaluate a simple strategy to reduce contamination in the operating room. *Anesth Analg* 2015; 120:848–52
28. Munoz-Price LS, Weinstein RA: Fecal patina in the anesthesia work area. *Anesth Analg* 2015; 120:703–5
29. Biddle C, Robinson K, Pike B, Kammerman M, Gay B, Verhulst B: Quantifying the rambunctious journey of the anesthesia provider's hands during simulated, routine care. *Am J Infect Control* 2016; 44:873–8
30. Birnbach DJ, Rosen LF, Fitzpatrick M, Carling P, Munoz-Price LS: The use of a novel technology to study dynamics of pathogen transmission in the operating room. *Anesth Analg* 2015; 120:844–7
31. Loftus RW, Muffly MK, Brown JR, Beach ML, Koff MD, Corwin HL, Surgenor SD, Kirkland KB, Yeager MP: Hand contamination of anesthesia providers is an important risk factor for intraoperative bacterial transmission. *Anesth Analg* 2011; 112:98–105
32. Russell RS, Meunier JC, Takikawa S, Faulk K, Engle RE, Bukh J, Purcell RH, Emerson SU: Advantages of a single-cycle production assay to study cell culture-adaptive mutations of hepatitis C virus. *Proc Natl Acad Sci U S A* 2008; 105:4370–5
33. Badr G, Bédard N, Abdel-Hakeem MS, Trautmann L, Willems B, Villeneuve JP, Haddad EK, Sékaly RP, Bruneau J, Shoukry NH: Early interferon therapy for hepatitis C virus infection rescues polyfunctional, long-lived CD8+ memory T cells. *J Virol* 2008; 82:10017–31
34. Paintsil E, Binka M, Patel A, Lindenbach BD, Heimer R: Hepatitis C virus maintains infectivity for weeks after drying on inanimate surfaces at room temperature: Implications for risks of transmission. *J Infect Dis* 2014; 209:1205–11
35. Sherman KE, Rouster SD, Horn PS: Comparison of methodologies for quantification of hepatitis C virus (HCV) RNA in patients coinfecting with HCV and human immunodeficiency virus. *Clin Infect Dis* 2002; 35:482–7
36. Behrendt P, Doerrbecker J, Riebesehl N, Wilhelm C, Ciesek S, Erichsen TJ, Steinmann J, Ott M, Manns MP, Pietschmann T, Steinmann E: Stability and transmission of hepatitis C virus in different anesthetic agents. *Am J Infect Control* 2013; 41:942–3
37. Doerrbecker J, Friesland M, Ciesek S, Erichsen TJ, Mateu-Gelabert P, Steinmann J, Steinmann J, Pietschmann T, Steinmann E: Inactivation and survival of hepatitis C virus on inanimate surfaces. *J Infect Dis* 2011; 204:1830–8
38. Doerrbecker J, Meuleman P, Kang J, Riebesehl N, Wilhelm C, Friesland M, Pfaender S, Steinmann J, Pietschmann T, Steinmann E: Thermostability of seven hepatitis C virus genotypes in vitro and in vivo. *J Viral Hepat* 2013; 20:478–85
39. Steinmann E, Ciesek S, Friesland M, Erichsen TJ, Pietschmann T: Prolonged survival of hepatitis C virus in the anesthetic propofol. *Clin Infect Dis* 2011; 53:963–4
40. Australian and New Zealand College of Anaesthetists: Guidelines for the Safe Management and Use of Medications in Anaesthesia. 2018. PS51. <http://www.anzca.edu.au/documents/ps51-2009-guidelines-for-the-safe-administration-o.pdf>. Accessed May 10, 2019
41. Association of Anaesthetists of Great Britain and Ireland: Infection control in anaesthesia. *Anaesthesia* 2008; 63:1027–36
42. Hajarizadeh B, Grady B, Page K, Kim AY, McGovern BH, Cox AL, Rice TM, Sacks-Davis R, Bruneau J, Morris M, Amin J, Schinkel J, Applegate T, Maher L, Hellard M, Lloyd AR, Prins M, Gekus RB, Dore GJ, Grebely J; InC3 Study Group: Factors associated with hepatitis C virus RNA levels in early chronic infection: The InC3 study. *J Viral Hepat* 2015; 22:708–17
43. Pawlotsky JM, Bouvier-Alias M, Hezode C, Darthuy F, Remire J, Dhumeaux D: Standardization of hepatitis C virus RNA quantification. *Hepatology* 2000; 32:654–9
44. Poynard T, McHutchison J, Goodman Z, Ling MH, Albrecht J: Is an “a la carte” combination interferon  $\alpha$ -2b plus ribavirin regimen possible for the first line treatment in patients with chronic hepatitis C?: The ALGOVIRC Project Group. *Hepatology* 2000; 31:211–8
45. Schijman A, Colina R, Mukomolov S, Kalina O, García L, Broor S, Bhupatiraju AV, Karayiannis P, Khan B, Mogdasy C, Cristina J: Comparison of hepatitis C viral loads in patients with or without coinfection with different genotypes. *Clin Diagn Lab Immunol* 2004; 11:433–5
46. Shata MT, Tricoche N, Perkus M, Tom D, Brotman B, McCormack P, Pfahler W, Lee DH, Tobler LH, Busch M, Prince AM: Exposure to low infective doses of HCV induces cellular immune responses without consistently detectable viremia or seroconversion in chimpanzees. *Virology* 2003; 314:601–16
47. Munoz-Price, LS, Bowdle A, Johnston BL, Bearman G, Camins BC, Dellinger EP, Geisz-Everson MA, Holzmans-Pazgal G, Murthy R, Pegues D, Prielipp RC, Rubin ZA, Schaffzin J, Yokoe D, Birnbach DJ: Infection prevention in the operating room anesthesia work area. *Infect Control Hosp Epidemiol*. 2018; 11:1–17
